# Supplementary material
Source: PubMed Central journal article supplement (PMC6682144)
Supplement: ao9b00863_si_001.pdf [file ao9b00863_si_001.pdf]

# Charge-Free Mixing Entropy Battery Enabled by Low-Cost Electrode Materials

Meng Ye <sup>ad</sup>, Mauro Pasta <sup>b#</sup>, Xing Xie <sup>a∇</sup>, Kristian L. Dubrawski <sup>a</sup>, Jianqiao Xu <sup>a</sup>, Chong Liu <sup>b◊</sup>, Yi Cui <sup>\*bc</sup> and Craig S. Criddle <sup>\*ad</sup>

<sup>a</sup>*Department of Civil and Environmental Engineering, Stanford University, Stanford, California 94305, USA. E-mail: [ccriddle@stanford.edu](mailto:ccriddle@stanford.edu)*

<sup>b</sup>*Department of Materials Science and Engineering, Stanford University, Stanford, California 94305, USA. E-mail: [yicui@stanford.edu](mailto:yicui@stanford.edu)*

<sup>c</sup>*Stanford Institute for Materials and Energy Sciences, SLAC National Accelerator Laboratory, Menlo Park, California 94025, USA*

<sup>d</sup>*Woods Institute for the Environment and the Department of Civil and Environmental Engineering, Stanford University, Stanford, California 94305, USA*

---

<sup>#</sup> Current address: Department of Materials, University of Oxford, Parks Road, Oxford OX1 3PH, United Kingdom

<sup>∇</sup> Current address: School of Civil and Environmental Engineering, Georgia Institute of Technology, Atlanta, GA 30332, United States

<sup>◊</sup> Current address: Institute for Molecular Engineering, University of Chicago, Chicago, IL 60637, United States

# Supporting Information

## Preparation of Prussian Blue (PB) Electrode

We prepared Prussian Blue powder using a solution based reaction:

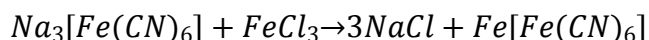

0.5 M sodium ferricyanide solution was mixed with 0.5 M ferric chloride in a hydrochloric acid solution at pH=2. A green precipitate was observed immediately. After 24 h, the sample was centrifuged and washed three times with deionized water, then dried in a vacuum oven. The synthesized PB powder was then coated onto a carbon cloth current collector through a slurry-coating method. The slurry was prepared by mixing PB powder (85% wt.) with Super-P ((TIMCAL, 8% wt.) and PVDF (7% wt.). We then added N-methyl pyrrolidone (NMP) to the mixture as solvent, and stirred the ink overnight before use. The current collector was a 3 cm x 3 cm carbon cloth with titanium wire connected. The electrode was prepared by coating the slurry onto the current collector and dried in a vacuum oven for 24 h. The loading of PB was  $\sim 7$  mg/cm<sup>2</sup>. To prevent attrition of the PB

particles on the electrode, a Na<sup>+</sup> permeable polyvinyl alcohol/sulfosuccinic acid (PVA/SSA) coating was also used, and prepared according to the literature<sup>1,2</sup>. A solution of PVA (10% wt.), SSA (30% wt.) and DI water (60% wt.) was stirred vigorously for 24 hours, then coated on the PB electrode with a scalpel blade. The PVA concentration was also varied (2-12% wt.) to determine the impact of coating composition. The electrode was then placed in an oven at 60 °C for one hour, 130 °C for another hour, and cooled to room temperature prior to using.

### **Preparation of Polypyrrole (PPy) Electrode**

We prepared the PPy electrode by electrochemically polymerizing PPy onto a carbon cloth current collector. The supporting solution was pyrrole (0.1 M) in the presence of NaCl (1 M). An anodic current of 1 mA/cm<sup>2</sup> was applied for six hours for polymerization of PPy. The PPy electrode was then electrochemically reduced in a 0.6 M NaCl solution to a potential of 0.2 V vs Ag/AgCl (3.5 M KCl).

### **Mixing Entropy Battery (MEB) Construction and Operation**

We constructed a MEB in a plate-shape glass chamber with the dimension of 3 cm × 3 cm × 0.3 cm. The volume of the chamber was 1.5 mL after embedding the PB electrode and the PPy electrode. For a long-term study of the MEB, two peristaltic pumps on programmable timers alternately flushed the MEB with seawater and wastewater effluent, enabling automatic and continuous operation.

### **Theoretical Potential Calculation**

The calculated theoretical potential is found by the Nernst Equation for the PB and PPy electrodes, respectively, as:

$$E_{PB} = E^0 + \frac{RT}{zF} \ln (a_{Na,\epsilon})$$

and

$$E_{PPy} = E^0 + \frac{RT}{zF} \ln (a_{Cl,\epsilon})$$

Where  $E^0$  is the standard reduction potential,  $R$  is the universal gas constant,  $T$  is the temperature,  $z$  is the charge transfer coefficient,  $F$  is Faraday's constant,  $a_{Na,\epsilon}$  and  $a_{Cl,\epsilon}$  are the activities for sodium and chloride in solution, respectively. Molarity was used in lieu of activity, in the range of 0.032 M to 2 M for  $Na^+$  and  $Cl^-$ . Standard reduction

potentials were taken from the literature<sup>3,4</sup>.

## References

- (1) Kim, D. S.; Guiver, M. D.; Nam, S. Y.; Yun, T. II; Seo, M. Y.; Kim, S. J.; Hwang, H. S.; Rhim, J. W. Preparation of Ion Exchange Membranes for Fuel Cell Based on Crosslinked Poly(Vinyl Alcohol) with Poly(Styrene Sulfonic Acid-Co-Maleic Acid). *J. Memb. Sci.* **2006**, *281* (1–2), 156–162.
- (2) Kim, Y.-J.; Choi, J.-H. Improvement of Desalination Efficiency in Capacitive Deionization Using a Carbon Electrode Coated with an Ion-Exchange Polymer. *Water Res.* **2010**, *44* (3), 990–996.
- (3) Ellis, D.; Eckhoff, M.; Neff, V. D. Electrochromism in the Mixed-Valence Hexacyanides. 1. Voltammetric and Spectral Studies of the Oxidation and Reduction of Thin Films of Prussian Blue. *J. Phys. Chem.* **1981**, *85* (9), 1225–1231.
- (4) Wernet, W.; Wegner, G. Electrochemistry of Thin Polypyrrole Films. *Makromol. Chemie-Macromolecular Chem. Phys.* **1987**, *188* (6), 1465–1475.

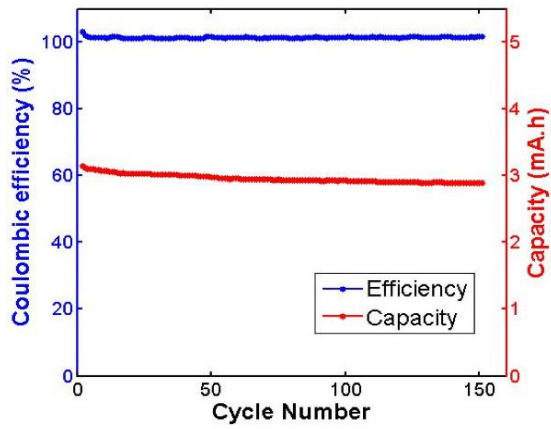

**Figure S1** Cycling performance of the PB electrode with a PVA/SSA coating: showing the coulombic efficiency and discharge capacity over 150 cycles.

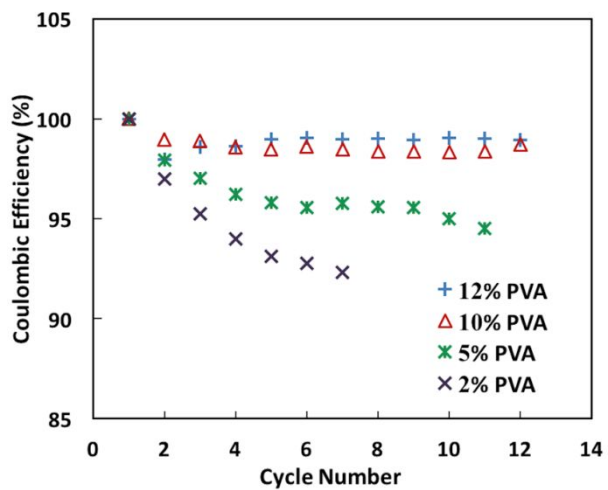

**Figure S2** Impact of PVA concentration in PVA/SSA coating on coulombic efficiency of PB cathode cycling.

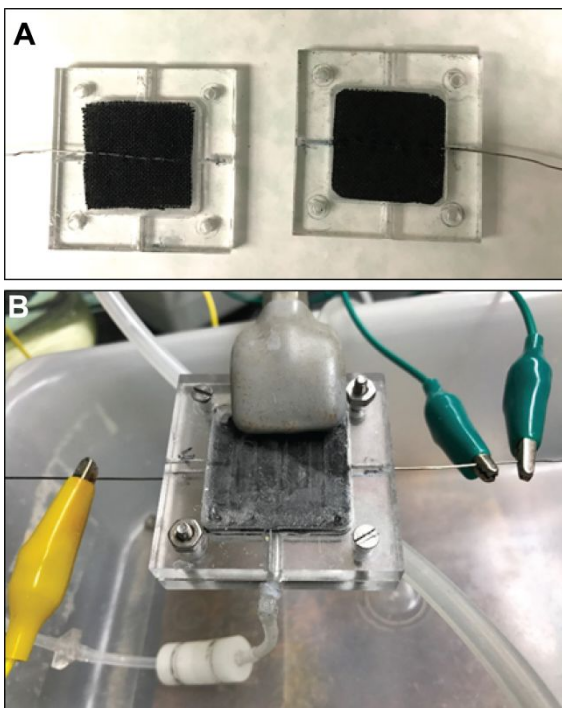

**Figure S3** (A) 3 cm  $\times$  3 cm MEB electrodes, Prussian Blue (left), PPy (right), plastic mesh separator not shown; (B) Charge-free MEB in operation. No input step requirement allows for simplified operation without a potentiostat or charge-input control mechanism. Photograph by M. Ye.



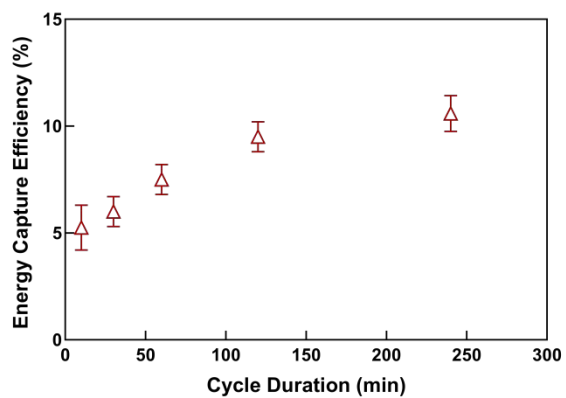

**Figure S4** Impact of duration on net energy recovery efficiency for single full-cell cycle, seawater salinity = 0.6 M NaCl, freshwater salinity = 0.032 M NaCl.

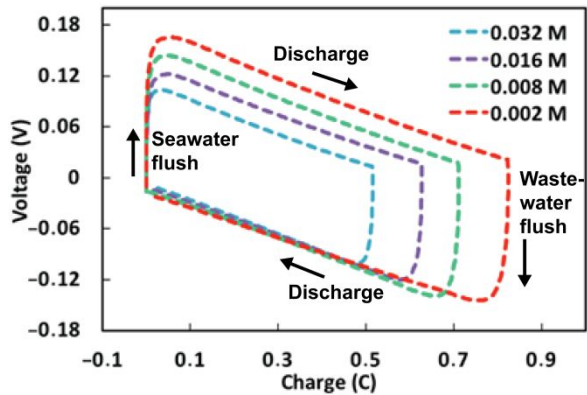

**Figure S5** Impact of freshwater salinity on energy extraction with PVA/SSA coating, seawater salinity = 0.6 M NaCl.

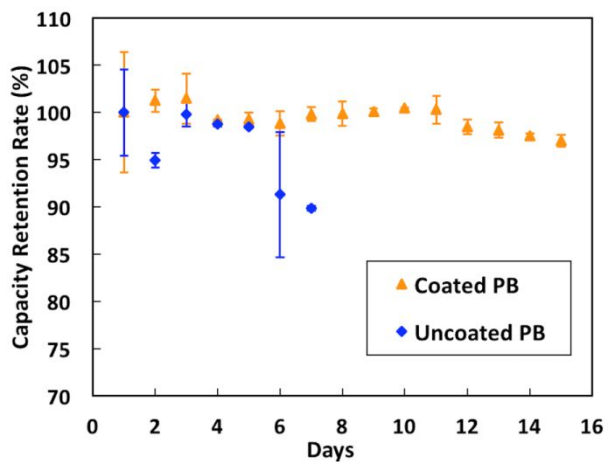

**Figure S6** Impact of PVA/SSA coating on full-cell capacity retention over 15 days (180 cycles), seawater salinity = 0.6 M NaCl, freshwater salinity = 0.032 M NaCl. Error bars indicate standard deviation.
